# Supplementary material for: The rectifying and negative differential resistance effects in graphene/h-BN nanoribbon heterojunctions
Source: Royal Society of Chemistry journal article supplement (doi:10.1039/c6cp05912k), 2016-01-01
Supplement: c6cp05912k1.pdf [file c6cp05912k1.pdf]

## Supplementary Information for

### **The rectifying and negative differential resistance effects in heterojunctions of graphene/*h*-BN nanoribbons**

Yipeng An,<sup>\*a</sup> Mengjun Zhang,<sup>a</sup> Dapeng Wu,<sup>b</sup> Tianxing Wang,<sup>a</sup> Zhaoyong Jiao,<sup>a</sup> Congxin Xia,<sup>a</sup> Zhaoming Fu<sup>ac</sup> and Kun Wang<sup>d</sup>

*<sup>a</sup>College of Physics and Materials Science, Henan Normal University, Xinxiang 453007, China.*

*E-mail address: ypan@htu.edu.cn.*

*<sup>b</sup>School of Chemistry and Chemical Engineering, Henan Normal University, Xinxiang 453007, China*

*<sup>c</sup>Beijing National Laboratory for Condensed Matter Physics, Institute of Physics, Chinese Academy of Sciences, Beijing 100190, China*

*<sup>d</sup>Department of Physics and Astronomy & NanoSEC, University of Georgia, Athens, GA 30602, USA*

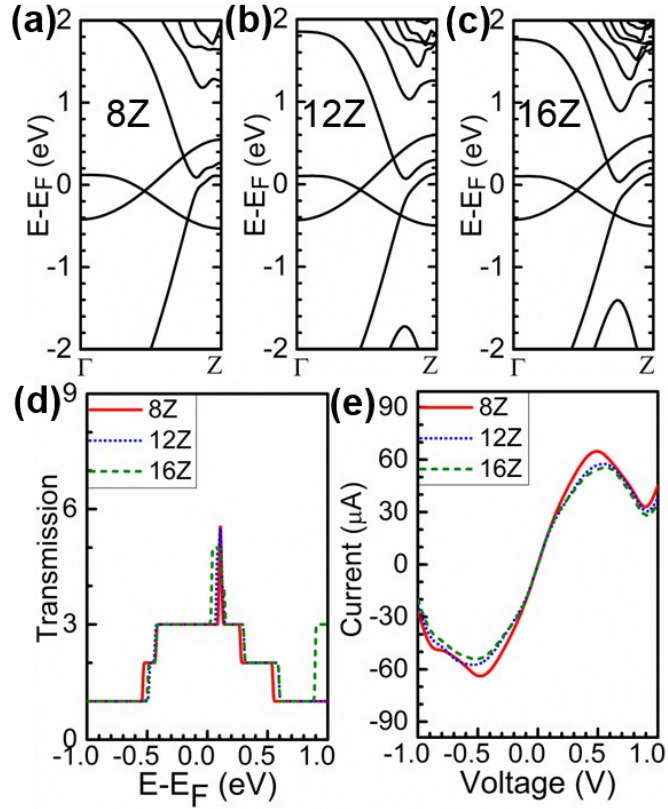

**Fig. S1** Band structures of Gra-BNud heterojunctions with 8 (a), 12 (b), and 16 (c) zigzag chains. (d) and (e) refer to the transmission spectra and  $I$ - $V$  curves of Gra-BNud heterojunctions with different widths.

The Gra-BNud heterojunctions with larger widths have the very similar band structures, transmission spectra, and  $I$ - $V$  curves.
